# Supplementary material for: Heterostructured Co-NTC@Co3S4 as an anode material for asymmetric pseudocapacitors
Source: Royal Society of Chemistry journal article supplement (doi:10.1039/d2ce00300g), 2022-01-01
Supplement: d2ce00300g1.pdf [file d2ce00300g1.pdf]

## Heterostructure Co-NTC@Co<sub>3</sub>S<sub>4</sub> as anode material for asymmetric pseudocapacitors

Xinjie Liu, Xinlong Zhang, Qingyang Yin, Rongmei Liu\*, Ning Liu, Jiwen Hu, Fengcui Shen,  
Xiandong Zhu\*

*Anhui Province Key Laboratory of Functional Coordinated Complexes for Materials Chemistry and Application,  
School of Chemical and Environmental Engineering, Anhui Polytechnic University, Wuhu Anhui 241000, P. R.  
China,*

*Fax: +86 553 2871 004; Tel: +86 553 2871 004*

*E-mail: liurongmei@ahpu.edu.cn · zhuxd@ahpu.edu.cn*

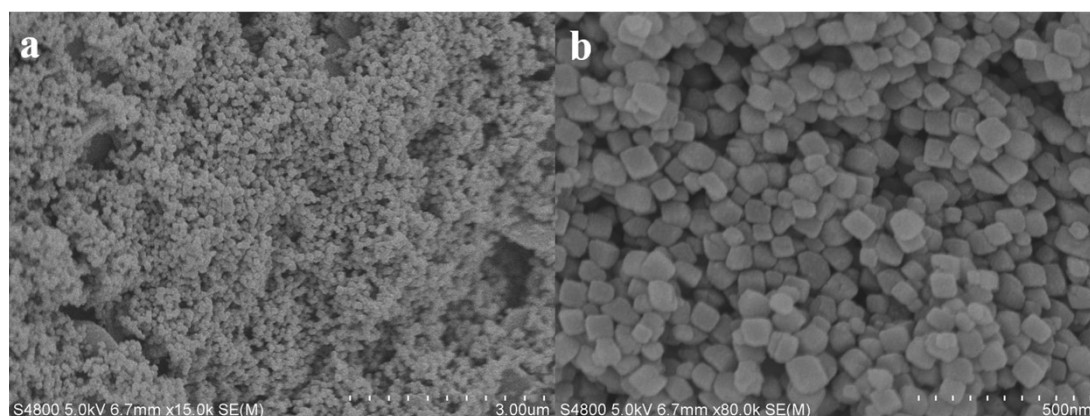

Fig.S1. SEM images of (a,b) ZIF-67-S.

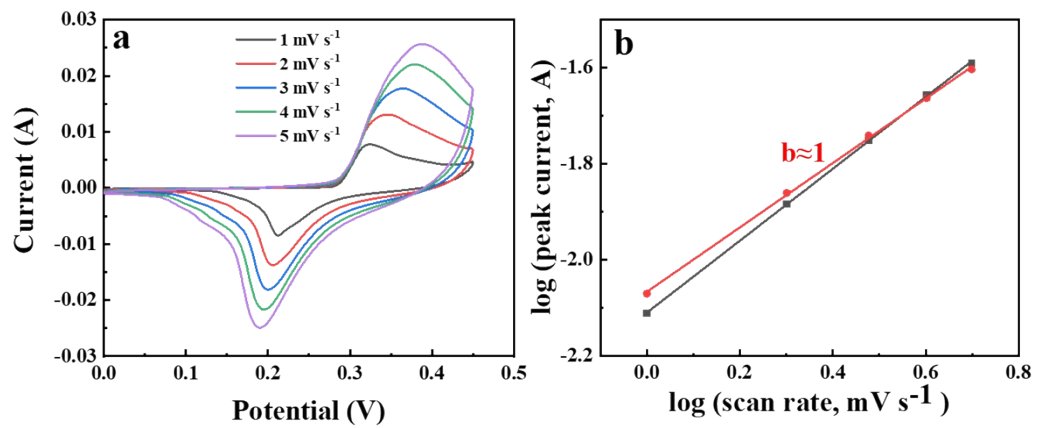

Fig.S2. (a) CV curves at 1-5 mV s<sup>-1</sup> of Co-NTC@Co<sub>3</sub>S<sub>4</sub>, (b) linear fitting diagram of log  $I$  and log  $v$ .
